# Supplementary material for: Short-Term Effects of a Myofunctional Appliance on Atypical Swallowing and Lip Strength: A Prospective Study
Source: J Clin Med. 2020 Aug 15;9(8):2652. doi: 10.3390/jcm9082652 (PMC7465646; doi:10.3390/jcm9082652)
Supplement: Supplementary file 1 [file jcm-09-02652-s001.xlsx]

## Sheet: Foglio1
Nome	Gender	Età (anni)	Range età	Forza del labbro T0 (newton)	Forza labbro T1 (newton)	Mese di Risoluzione	Corretto/non corretto	Differenza	T test
C ARIANNA	1	5	1	100	450	3	1	350
P DIAMANTE	1	6	1	260	610	3	1	350
DC AURORA	1	6	1	100	420	4	1	320
C ANDREA	2	7	1	120	400	4	1	280
C LORENZO	2	7	1	80	240	5	1	160
B MIRIAM	1	8	1	140	440	4	1	300
A FRANCESCO	2	8	1	120	320	4	1	200
C ALICE	1	8	1	110	300	5	1	190
DO ELEONORA	1	8	1	210	620	5	1	410
P VIOLA	1	8	1	320	650	5	1	330
B ZOE	1	8	1	80	310	6	1	230
DP MATTEO	2	8	1	110	400	6	1	290
I MATILDA	1	8	1	320	500	6	1	180
S LAURA	1	8	1	220	400	6	1	180
A LAURA	1	9	1	300	450	4	1	150
C EMANUELE	2	9	1	210	400	5	1	190
P GIADA	1	9	1	120	500	5	1	380
S FLAVIO	2	9	1	340	480	5	1	140
C ELEONORA	1	9	1	280	400	6	1	120
R ANDREA	2	9	1	290	420	6	1	130
D ANITA	1	10	1	350	500	5	1	150
F GIANMARIA	2	10	1	180	600	5	1	420
C CLAUDIA	1	10	1	220	400	6	1	180
G SARA	1	10	1	200	600	6	1	400
C PASQUALE	2	11	1	200	800	6	1	600
G AURORA	1	11	1	140	540	6	1	400
G MARZIO	2	12	1	200	600	5	1	400
F EMMA	1	12	1	100	720	6	1	620
I CHIARA	1	12	1	210	530	6	1	320
N JACOPO	2	12	1	310	610	6	1	300
P MARTINA	1	12	1	100	500	6	1	400
R MATTEO	2	12	1	160	520	6	1	360
A TOMMASO	2	13	1	80	520	5	1	440
Mean		9.21212	1	190.303	489.394	5.18182	1	299.091	1.23813e-14
SD		2.02728	0	86.0409	123.363	0.917011	0	128.631
M ANTONIO	2	6	1	80	300	0	0
O SOPHIE	1	7	1	180	320	0	0
R VERONICA	1	8	1	320	400	0	0
V LUIGI	2	9	1	300	400	0	0
DL GAIA	1	12	1	80	540	0	0
C KRISTEL	1	13	1	180	380	0	0
P DAVIDE	2	13	1	480	520	0	0
MEAN		9.71429	1	231.429	408.571	#DIV/0!	0
SD		2.9277	0	144.618	91.5475
